# Supplementary material for: Epithelial requirement for in vitro proliferation and xenograft growth and metastasis of MDA-MB-468 human breast cancer cells: oncogenic rather than tumor-suppressive role of E-cadherin
Source: Springer Nature journal article supplement (doi:10.1186/s13058-017-0880-z), 2017-07-27

A

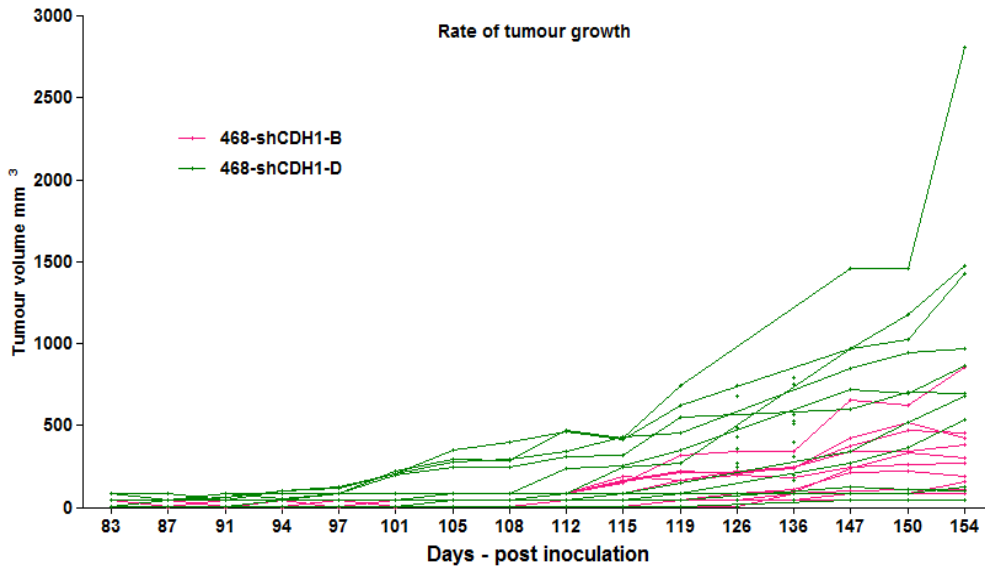

B

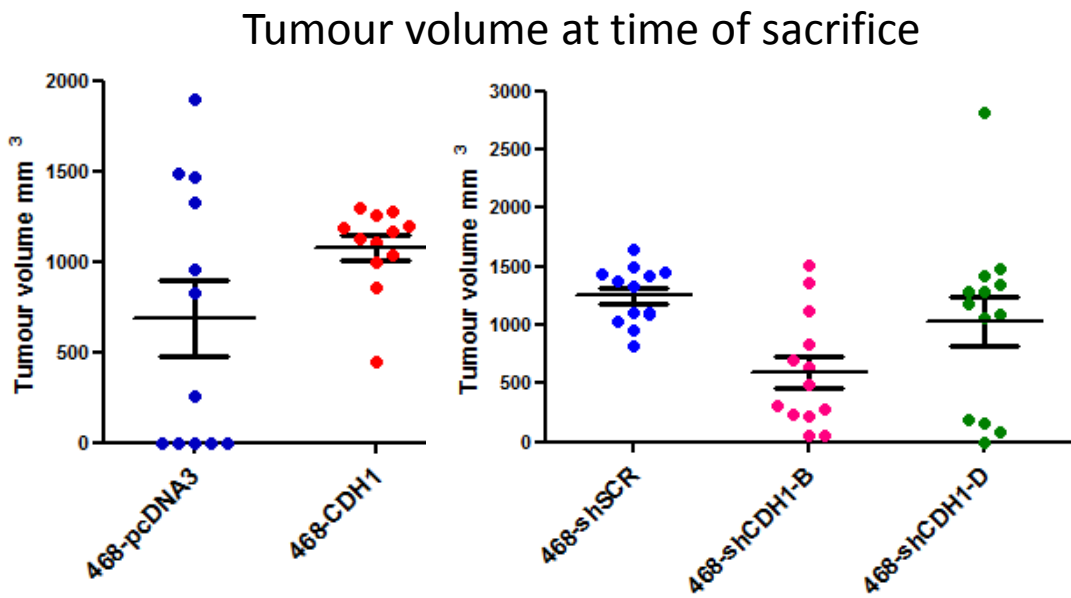

Supplement: MOESM2 [file 13333648]
