# Supplementary material for: Epithelial requirement for in vitro proliferation and xenograft growth and metastasis of MDA-MB-468 human breast cancer cells: oncogenic rather than tumor-suppressive role of E-cadherin
Source: Springer Nature journal article supplement (doi:10.1186/s13058-017-0880-z), 2017-07-27
Supplement: MOESM3 [file 13333648]

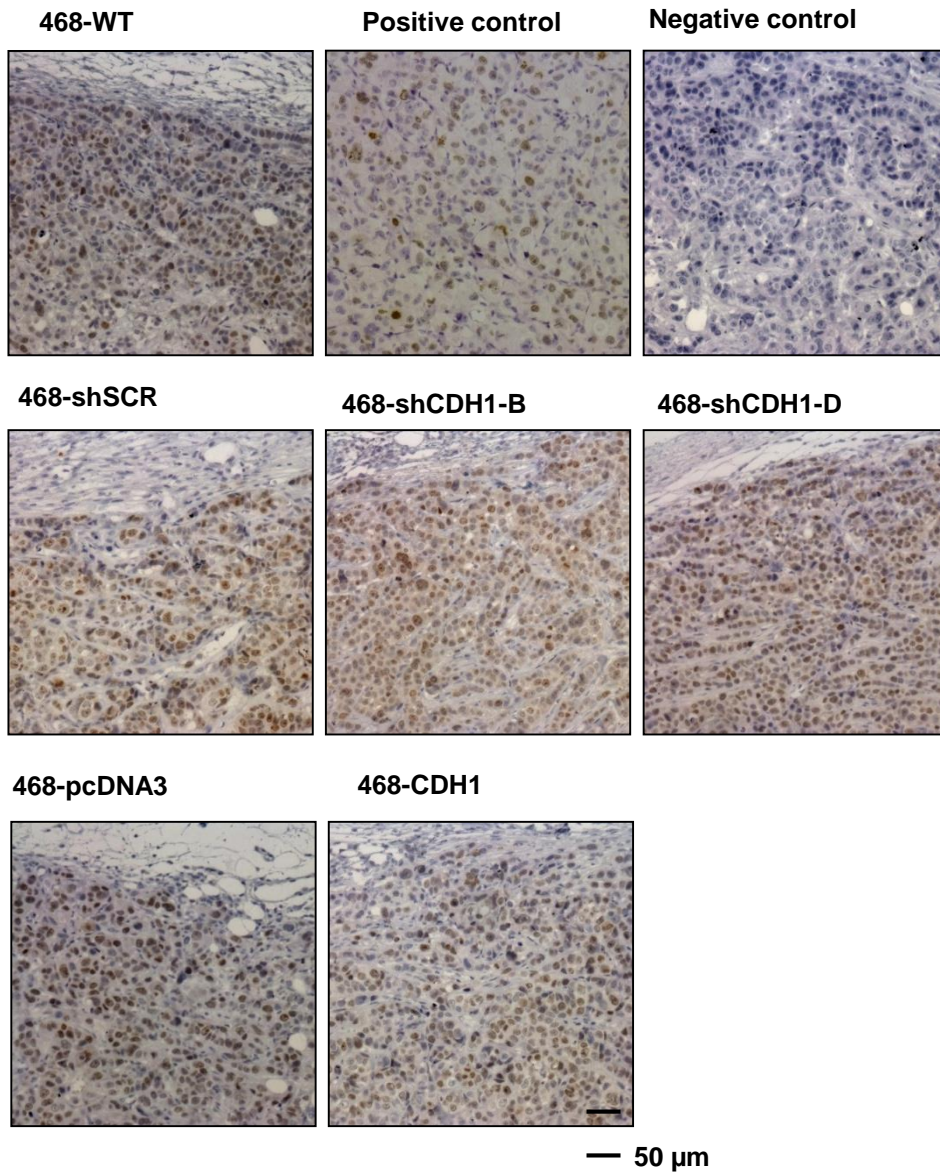

Supplementary figure 3
